# Supplementary material for: A robust and stretchable cross-linked rubber network with recyclable and self-healable capabilities based on dynamic covalent bonds
Source: Royal Society of Chemistry journal article supplement (doi:10.1039/c8ta11587g), 2019-01-01
Supplement: c8ta11587g1.pdf [file c8ta11587g1.pdf]

Supplementary Information for

## Robust and stretchable cross-linked rubber network with recyclable and self-healable capabilities based on dynamic covalent bonds

Liming Cao, Jianfeng Fan, Jiarong Huang, Yukun Chen\*

Lab of Advanced Elastomer, School of Mechanical and Automobile Engineering, South China University of Technology, Guangzhou 510640, China. Email: [cyk@scut.edu.cn](mailto:cyk@scut.edu.cn)

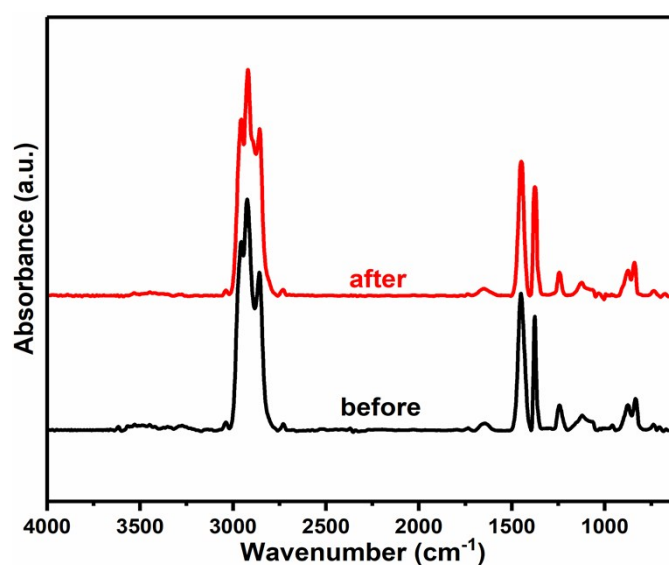

**Fig. S1.** FTIR spectra of neat ENR before and after compression molding at 180 °C.

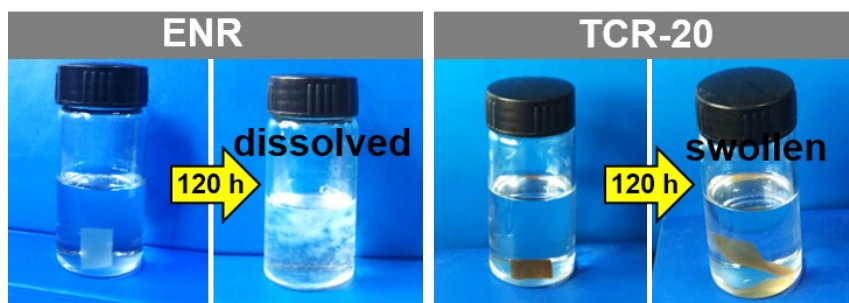

**Fig. S2.** Photos of equilibrium swelling experiments for neat ENR and TCR-30 sample.

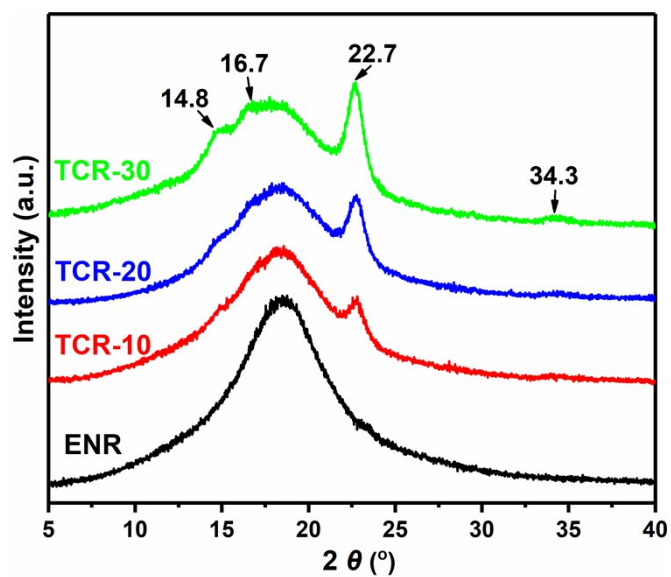

Fig. S3. XRD patterns of TCR samples with different TOCNs content.

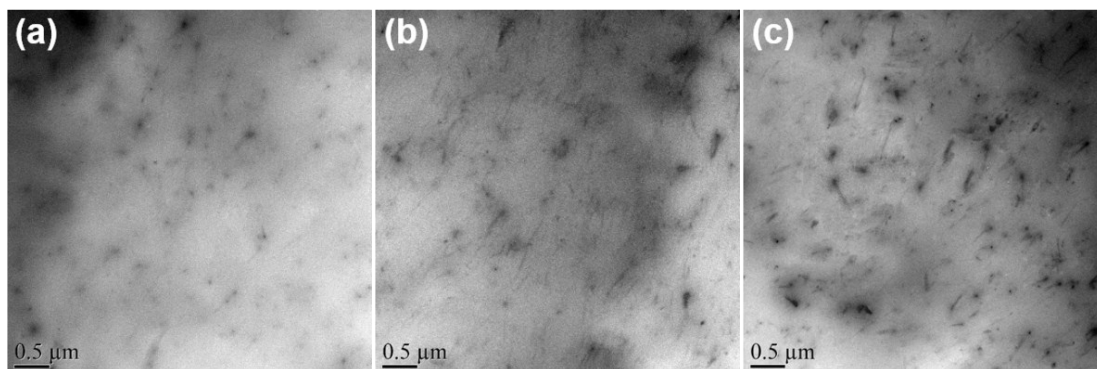

Fig. S4. TEM images of the TCR samples: (a) TCR-10; (b) TCR-20 and (c) TCR-30.

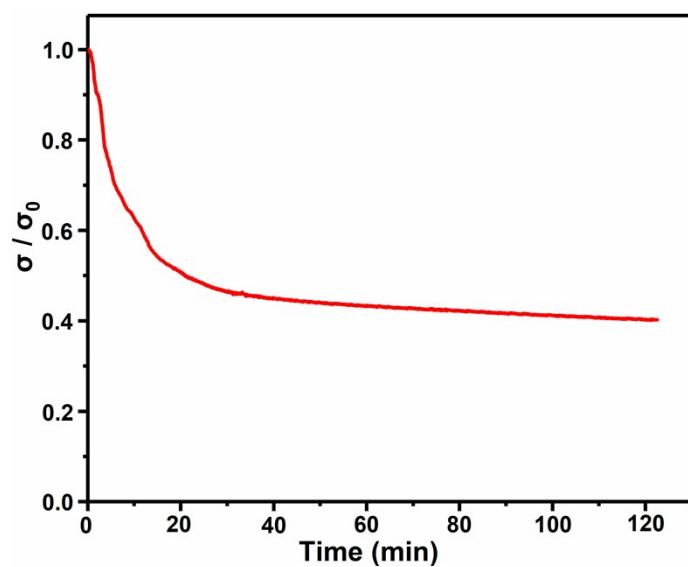

Fig. S5. Stress relaxation behavior of ENR/t-CNs-20 at 180 °C.

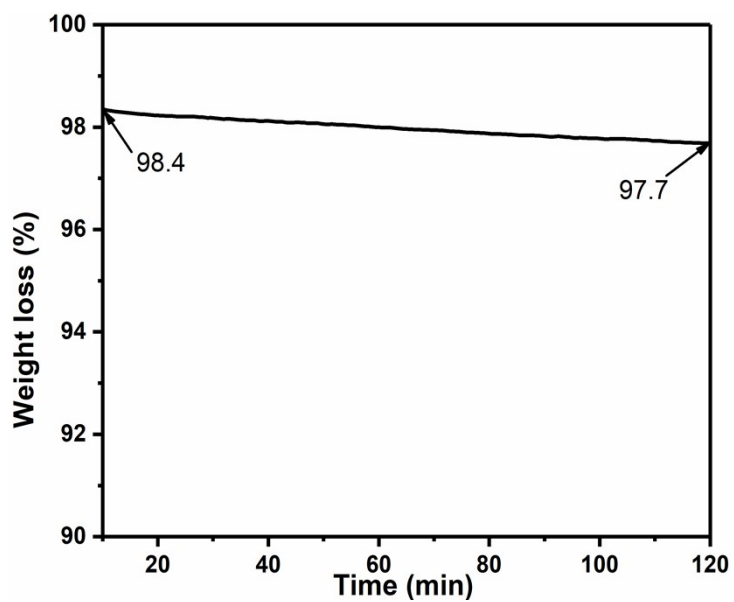

Fig. S6. Isothermal TGA curve of TCR-20 sample under air atmosphere at 180 °C for 2 h. The weight loss before 180 °C was due to the evaporation of the absorbed water.

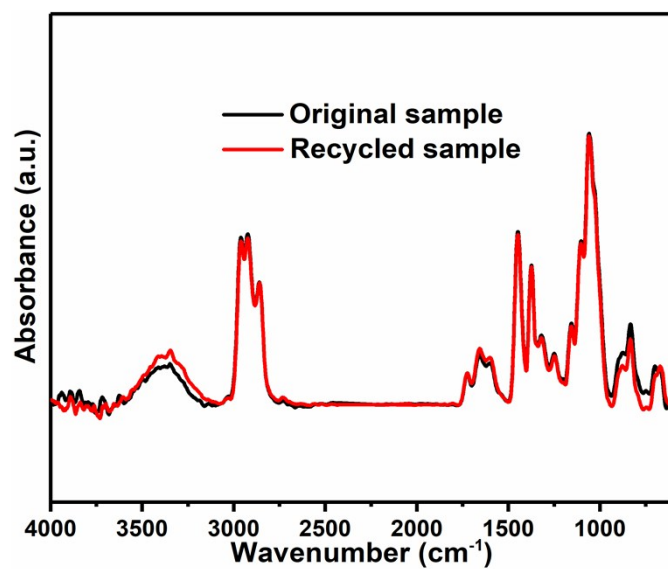

Fig. S7. FTIR spectra of TCR-20 before and after reprocessing.

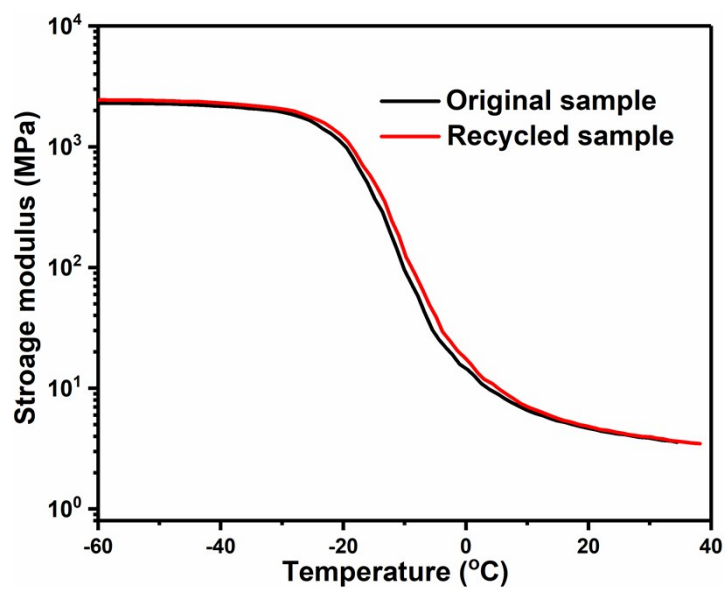

Fig. S8. Temperature dependence of  $E'$  of TCR-20 sample before and after reprocessing.

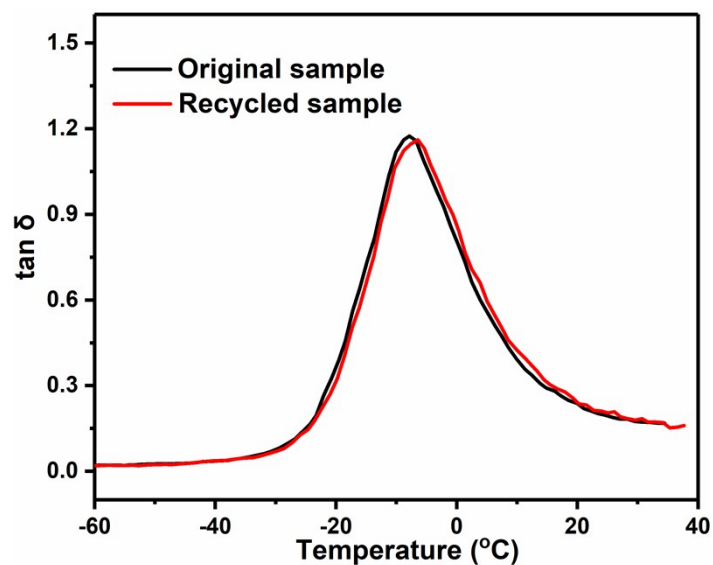

**Fig. S9.** Tan  $\delta$ -temperature curves of TCR-20 sample before and after reprocessing.

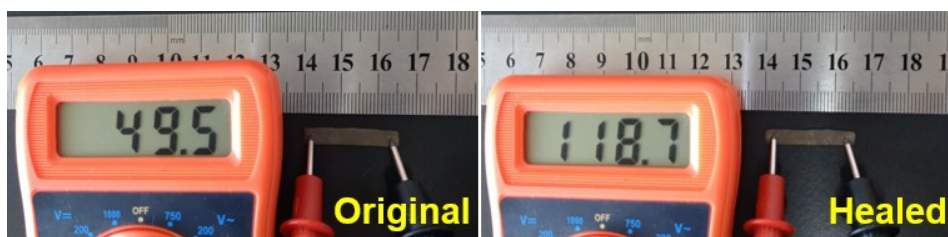

**Fig. S10.** Resistance change before and after self-healing of electric device taking TCR-20 sample as substrate.

**Table S1.**  $E'$  of neat ENR and TCR samples at glassy (-50 °C) and rubbery (20 °C) state.

| Samples | $E'$ (-50 °C, MPa) | $E'$ (20 °C, MPa) |
|---------|--------------------|-------------------|
| ENR     | 1800               | 1.6               |
| TCR-10  | 2084               | 2.8               |
| TCR-20  | 2076               | 4.7               |
| TCR-30  | 2596               | 7.5               |

**Table S2.** Mechanical properties of ENR/TOCNs composites.

| Samples | Tensile strength (MPa) | Strain at break (%) | 100% modulus (MPa) | 300% modulus (MPa) | 500% modulus (MPa) |
|---------|------------------------|---------------------|--------------------|--------------------|--------------------|
| ENR     | 0.88                   | 370                 | 0.45               | 0.60               | --                 |
| TCR-10  | 3.64                   | 815                 | 0.58               | 1.04               | 1.55               |
| TCR-15  | 5.19                   | 791                 | 0.71               | 1.42               | 2.29               |
| TCR-20  | 5.76                   | 764                 | 0.84               | 1.64               | 2.64               |
| TCR-25  | 6.58                   | 648                 | 0.92               | 2.17               | 4.25               |
| TCR-30  | 7.26                   | 596                 | 1.19               | 2.84               | 5.47               |

**Table S3.** Comparison of mechanical properties between the reported elastomeric vitrimers and TCR samples prepared in this work.

| Material system                                                 | Exchange bond       | Tensile strength (MPa) | Strain at break (%) | Ref.      |
|-----------------------------------------------------------------|---------------------|------------------------|---------------------|-----------|
| Polybutadiene rubber and liquid polysulfide polymers            | disulfide           | ~1.5                   | ~155                | 1         |
| ENR and dithiodibutyric acid                                    | disulfide           | 12 ± 2                 | 530 ± 20            | 2         |
| Polybutadiene rubber                                            | disulfide           | ~3.3                   | ~380                | 3         |
| ENR and citric acid-modified bentonite (20 phr)                 | transesterification | ~4.5                   | ~400                | 4         |
| Carboxyl styrene butadiene rubber and epoxidized silica (30phr) | transesterification | 9.9 ± 0.7              | 226 ± 16            | 5         |
| Polybutadiene rubber, benzene-1, 3, 5-tricarbaldehyde           | Imine bond          | 0.39 ± 0.2             | 52 ± 9              | 6         |
| Polydimethylsiloxane and pripol 1017                            | transesterification | ~0.45                  | ~45                 | 7         |
| ENR and carboxyl cellulose nanocrystals (20 phr)                | transesterification | ~5.76                  | ~764                | This work |

## References

- 1 H. Xiang, JH. Yin, G. Lin, X. Liu, M. Rong and M. Qiu, *Chem. Eng. J.*, 2019, **358**, 878-890.
- 2 L. Imbernon, E. K. Oikonomou, S. Norvez and L. Leibler, *Polym. Chem.*, 2015, **6**, 4271-4278.
- 3 H. P. Xiang, H. J. Qian, Z. Y. Lu, M. Z. Rong and M. Q. Zhang, *Green Chem.*, 2015, **17**, 4315-4325.
- 4 C. Xu, R. Cui, L. Fu and B. Lin, *Compos. Sci. Technol.*, 2018, **167**, 421-430.
- 5 Y. Liu, Z. Tang, Y. Chen, C. Zhang and B. Guo, *ACS Appl. Mater. Interfaces*, 2018, **10**, 2992-3001.
- 6 H. Zhang, D. Wang, W. Liu, P. Li, J. Liu, C. Liu, J. Zhang, N. Zhao and J. Xu, *J. Polym. Sci., Part A: Polym. Chem.*, 2017, **55**, 2011-2018.
- 7 H. Zhang, C. Cai, W. Liu, D. Li, J. Zhang, N. Zhao and J. Xu, *Sci. Rep.*, 2017, **7**, 11833
